# Supplementary material for: Microneedling and Its Use in Hair Loss Disorders: A Systematic Review
Source: PubMed Central journal article supplement — Dermatol Ther (Heidelb). 2021 Dec 1;12(1):41–60. doi: 10.1007/s13555-021-00653-2 (PMC8776974; doi:10.1007/s13555-021-00653-2), 2021-12-01
Supplement: 13555_2021_653_MOESM1_ESM.pdf [file 13555_2021_653_MOESM1_ESM.pdf]

*Supporting Information for:*

# Microneedling and its use in hair loss disorders: a systematic review

Robert S. English Jr.<sup>1,\*</sup>, Sophia Ruiz<sup>1</sup>, and Pedro DoAmaral<sup>1</sup>

<sup>1</sup>Perfect Hair Health

2021 Fillmore, Ste 98, San Francisco, CA 94115

\*Corresponding Author:

Robert S. English, Jr.

2021 Fillmore, Ste 98

San Francisco, CA 94115

United States

rob@perfecthairhealth.com

***3 pages***  
***1 table***

**Table S1. Jadad scores for included studies.**

|                                    | Criteria (yes: 1, no: 0)           |                                |                                            |                                              |                                     |                   |
|------------------------------------|------------------------------------|--------------------------------|--------------------------------------------|----------------------------------------------|-------------------------------------|-------------------|
| Author (year), hair loss type      | Was there randomization mentioned? | Was double-blinding mentioned? | Was the method of randomization described? | Was the method of double-blinding mentioned? | Are the fate of all patients known? | Total study score |
| Ramadan <i>et al.</i> (2021) (12)  | Yes                                | No                             | No                                         | No                                           | Yes                                 | 2                 |
| Sohng <i>et al.</i> (2021) (13)    | No                                 | No                             | No                                         | No                                           | Yes                                 | 1                 |
| Burns <i>et al.</i> (2021) (14)    | No                                 | No                             | No                                         | No                                           | Yes                                 | 1                 |
| Gowda <i>et al.</i> (2021) (15)    | No                                 | No                             | No                                         | No                                           | Yes                                 | 1                 |
| Shome <i>et al.</i> (2021) (16)    | Yes                                | No                             | No                                         | No                                           | Yes                                 | 2                 |
| Ozcan <i>et al.</i> (2021) (17)    | Yes                                | No                             | No                                         | No                                           | Yes                                 | 2                 |
| Yu, <i>et al.</i> (2020) (18)      | Yes                                | No                             | Yes                                        | No                                           | Yes                                 | 3                 |
| Bao <i>et al.</i> (2020) (19)      | Yes                                | No                             | No                                         | No                                           | Yes                                 | 3                 |
| Aggarwal <i>et al.</i> (2020) (20) | Yes                                | Yes                            | No                                         | No                                           | Yes                                 | 3                 |
| Faghihi <i>et al.</i> (2020) (21)  | Yes                                | No                             | No                                         | No                                           | Yes                                 | 2                 |
| Starace <i>et al.</i> (2019) (22)  | No                                 | No                             | No                                         | No                                           | Yes                                 | 1                 |

|                                      |     |    |     |    |     |   |
|--------------------------------------|-----|----|-----|----|-----|---|
| Kumar <i>et al.</i> (2018) (23)      | Yes | No | No  | No | Yes | 2 |
| Yu <i>et al.</i> (2018) (24)         | Yes | No | Yes | No | Yes | 3 |
| Bao <i>et al.</i> (2017) (25)        | Yes | No | Yes | No | Yes | 3 |
| Shah <i>et al.</i> (2017) (26)       | Yes | No | No  | No | Yes | 2 |
| Dhurat <i>et al.</i> (2013) (11)     | Yes | No | Yes | No | Yes | 3 |
| Lee <i>at al.</i> (2013) (27)        | No  | No | No  | No | Yes | 1 |
| Aboeldahab <i>et al.</i> (2021) (28) | Yes | No | Yes | No | Yes | 3 |
| Ragab <i>et al.</i> (2020) (29)      | Yes | No | Yes | No | Yes | 3 |
| Abdallah <i>et al.</i> (2020) (30)   | Yes | No | No  | No | Yes | 2 |
| Giorgio <i>et al.</i> (2019) (31)    | No  | No | No  | No | Yes | 1 |
| Yoo <i>et al.</i> (2010) (32)        | No  | No | No  | No | Yes | 1 |

A table summarizing Jadad scores for all studies included in the systematic review.
